# Supplementary material
Source: Elsevier journal article supplement (https://www.sciencedirect.com/science/article/pii/S1699885519300364)
Supplement: mmc1 [file S1699885519300364:mmc1.docx]

**ANEXO 1.** Lista de verificación del informe anatomopatológico para cáncer tiroideo.

Nº INFORME:______Nombre____________________________________________Sexo: M_F_

Fecha de nacimiento:__/__/____Nº Hª Clínica___________Servicio_______________________

Médico_______________________Fecha de recepción__/__/____Fecha del informe__/__/____

Datos clínicos_________Exposición a radiación___________Historia familiar________________

PAAF (Bethesda 2ª ed)__________BAG______________Otros comentarios________________

**TIPO DE MUESTRA:**

Fresca___Fijada___Intacta___Seccionada/rota_________Peso___g. Foto macro____________

Tamaño: LD___x___x___ LI___x___x___ LPiramidal___x___x___Otro____________________

Reintervención (completa tiroidectomía parcial previa)__________________________________ Tiroidectomía total__Tiroidectomía casi total__Lobectomía D__Lobectomía I____Istmectomía__

Biopsia de tiroides___Biopsia /resección de metástasis (especificar_______________________)

Muestras adicionales (p. ej. ganglios), especificar______________________________________

**LOCALIZACIÓN DEL CARCINOMA:**

LD___LI___Istmo___Otra* (especificar)______________Tumor unifocal___Tumor bilateral____

Tamaño del tumor primario (el mayor si son múltiples)__________________________________

Tamaño imposible de determinar (especificar)_________________________________________

**TIPO DE CANCER:**

*- Carcinoma papilar:* clásico (convencional)*,* microcarcinoma papilar***,* variante (v) encapsulada*,* v. folicular infiltrativa*,* v. folicular encapsulada con invasión, v. macrofolicular, v.folicular difusa (multinodular), v. esclerosante difusa, v. de células altas, v. de células columnares, v. cribiforme-morular, v. de células “hobnail” (en tachuela), v. con estroma tipo fibromatosis/fascitis, v. sólida/trabecular, v. oncocítica, v. de células claras y v. de tipo Warthin_____________________

*- Carcinoma folicular:* mínimamente invasivo, encapsulado angioinvasivo y ampliamente invasivo_______________________________________________________________________

*- Carcinoma oncocítico (de células de Hürthle):* mínimamente invasivo, encapsulado angioinvasivo y ampliamente invasivo_______________________________________________

*- Carcinoma pobremente diferenciado* (indicar si oncocítico)______________________________

*- Carcinoma anaplásico (indiferenciado)* (indicar el porcentaje de carcinoma bien y/o pobremente diferenciado si existe)____________________________________________________________

*- Carcinoma medular* (indicar si existe hiperplasia primaria de células C)____________________

- *Otro tipo de neoplasia maligna* (especificar)_________________________________________

**INVASIÓN CAPSULAR:** Si___No___Nº de focos______________________________________

**INVASIÓN VASCULAR:** Si___No___Nº de focos______________________________________

**INFILTRACIÓN PERINEURAL:** Si___No___Nº de focos________________________________

**EXTENSIÓN EXTRATIROIDEA:** Si___No___Microscópica___Macroscópica (especificar)______

**MÁRGENES DE RESECCIÓN:** R0___R1___R2_______________________________________

**GANGLIOS LINFÁTICOS:**

Número de ganglios (NG) muestreados___ NG metastásicos___ Localización_______________ Tamaño del ganglio metastásico mayor___Tamaño de la metástasis dentro del ganglio________ Presencia de extensión extraganglionar______________________________________________

**PATOLOGÍA TIROIDEA ADICIONAL**: No___Si (especificar)_____________________________

**INMUNOHISTOQUÍMICA**: Tiroglobulina___Calcitonina___TTF1___%Ki-67___Otros__________

**DATOS MOLECULARES**: BRAF___TERT___RET___Otros_____________________________

**GLÁNDULAS PARATIROIDES:___________________________________________________**

**ESTADIO** (pTNM AJCC 8ª edición):_________________________________________________

*Indicar la procedencia si el tejido es ectópico (quiste tirogloso, mediastino, lingual,etc.).

**Si el microcarcinoma papilar es múltiple indicar si es bilateral, el subtipo histológico de los tumores si hay más de uno y el diámetro del mayor.
